# Supplementary material for: In situ synchrotron radiation investigation of V2O5–Nb2O5 metastable compounds: transformational kinetics at high temperatures with a new structural solution for the orthorhombic V4Nb20O60 phase
Source: Royal Society of Chemistry journal article supplement (doi:10.1039/d0dt03426f), 2020-01-01
Supplement: d0dt03426f1.pdf [file d0dt03426f1.pdf]

## Supplementary information

### Further data involving 1:2 and 1:3 ratio mixtures.

The view presented above is coherent for explaining the behaviour observed in the figures S1

(a) and (b) respectively after extended ball milling and thermal treatments:

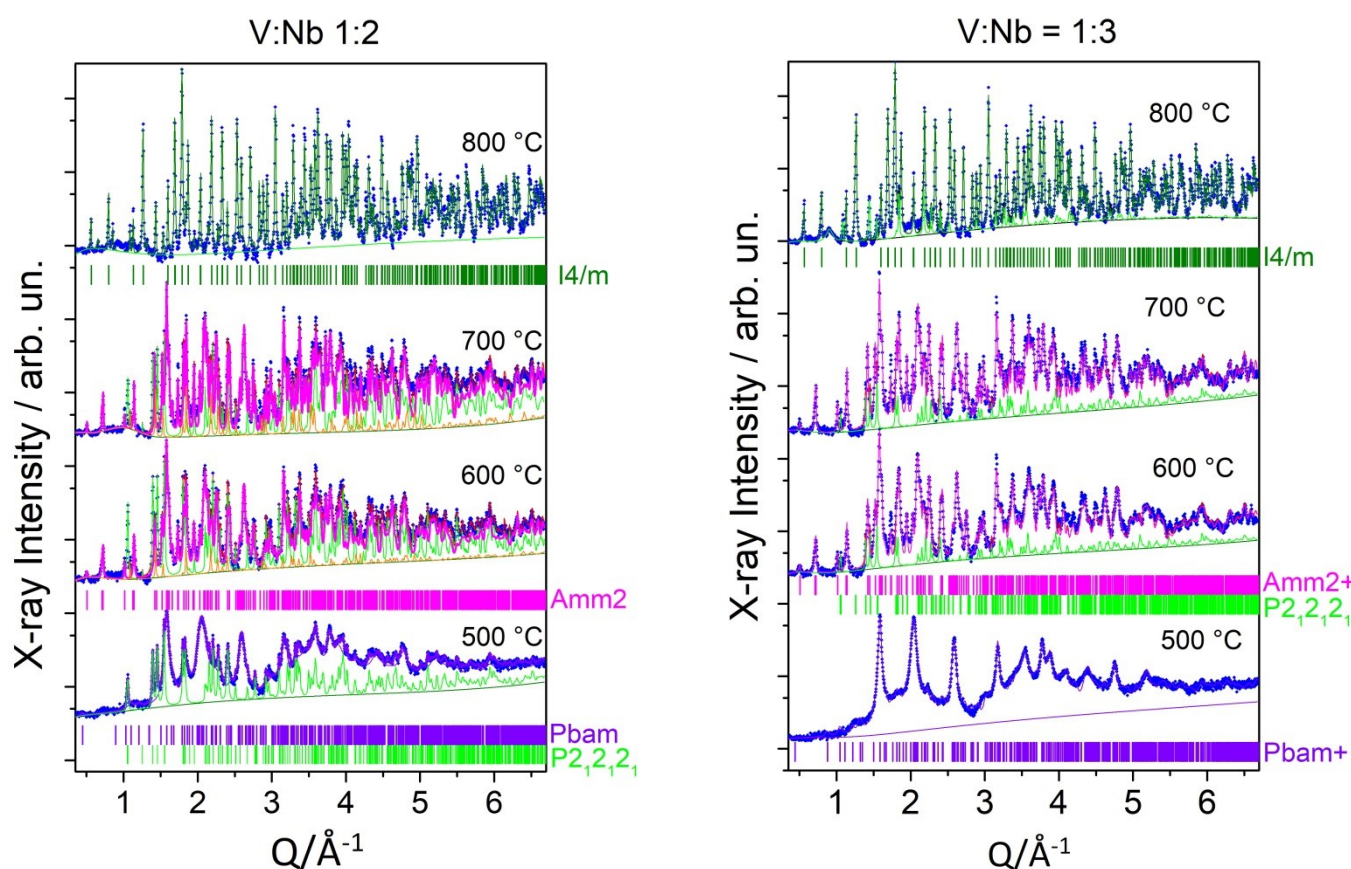

**Figure S1**

The XRD patterns (laboratory equipment) of the 1-to-2 and 1-to-3  $V_2O_5$ - $Nb_2O_5$  molar mixtures ball milled for 24 h and subjected to ex-situ thermal annealing (holding time 2 h) at the indicated temperatures.

We can see that for the 1:2 mixture ratio, the XRD ex-situ experiment after annealing at 500 °C displays occurrence of the pseudo-hexagonal sequence (presumably a solid solution with composition  $[V_{0.33}Nb_{0.67}]_2O_5$  described with a distorted  $Pbam$  space group) and the equimolar  $P2_12_12_1$  compound<sup>1</sup> (originally attributed to the  $Pnma$  space group<sup>2</sup>). After further annealing at 600 °C and

700 °C respectively, we observe the occurrence of the orthorhombic  $Amm2$   $VNb_5O_{15}$  phase with the  $P2_12_12_1$   $VNbO_5$  phase. Note that the cyan line component used to represent the  $VNbO_5$  phase is weakened going from 600 °C to 700 °C. Finally, after annealing at 800 °C (holding time 2 h) the total occurrence of the  $VNb_9O_{25}$  phase is confirmed, which supports the view of  $V_2O_5$  evolution operating beyond the specific transformation processes.

The 1:3 mixture shows a similar behavior at the parity of annealing treatments (*Figure S1*). Here the amorphous component seems to have resisted to the temperature treatment at 500 °C at least partially. For the temperature treatments of 600 °C and 700 °C, respectively, we observe again the simultaneous occurrence of the  $Amm2$   $VNb_5O_{15}$  phase together with the  $P2_12_12_1$   $VNbO_5$  phase, the latter in a lower quantity concerning the corresponding patterns shown in the lhs figure, in rough agreement with the expectation from the lever rule. Weak traces of  $V_2O_5$  phase are also appreciable at 800°C suggesting a disproportionation of metastable phases ( $Amm2$  and  $P2_12_12_1$ ) eventually evolving to  $VNb_9O_{25}$  and  $V_2O_5$ , regardless of the starting reagents ratio.

### TEM analysis

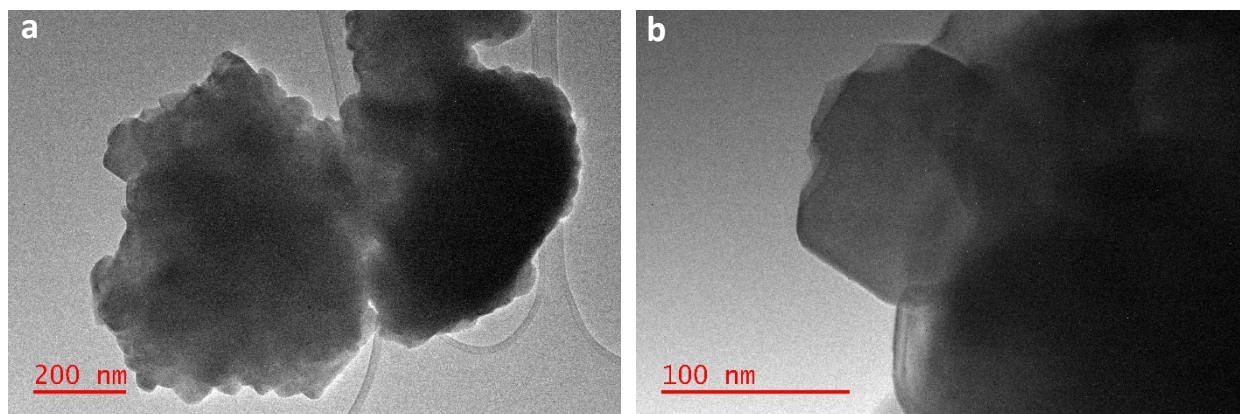

**Figure S2**

*TEM micrographs of the sample annealed at 700° C at different magnifications.*

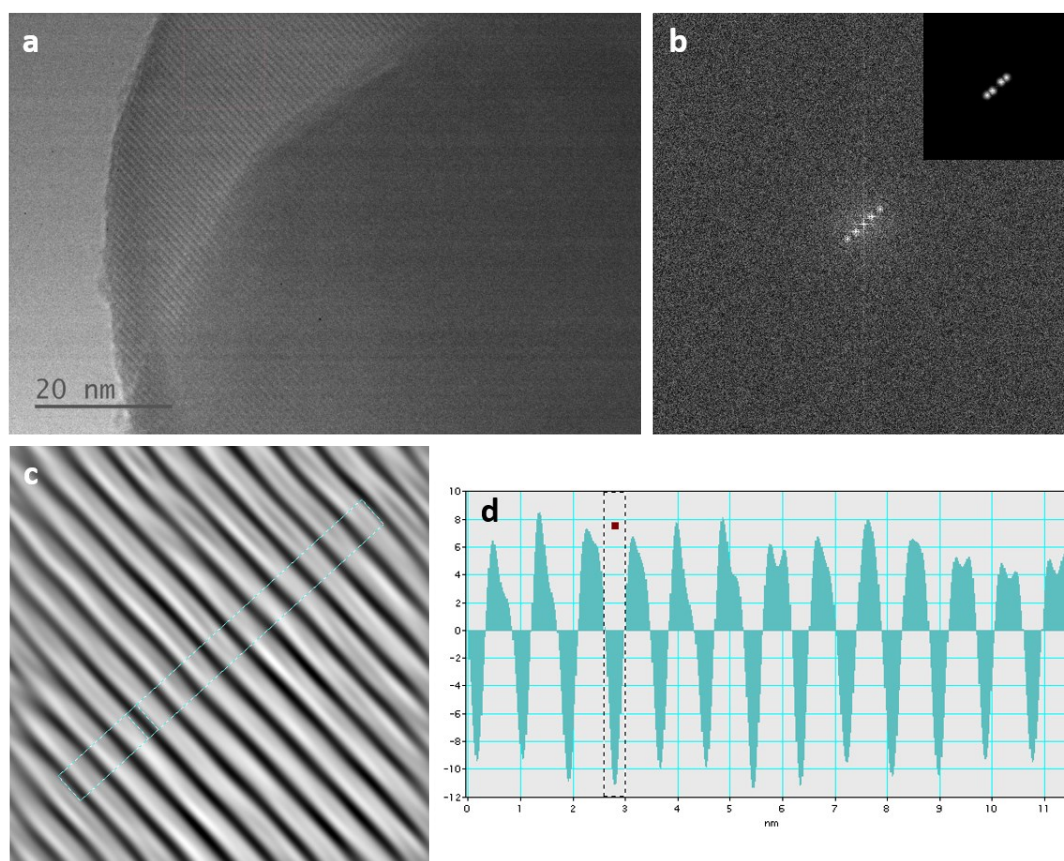

**Figure S3.**

*a) HR-TEM image, b) FFT applied to the oriented crystalline planes and its residual masked contribution on the inset, c) inverse FFT and d) integrated area.*

**TABLE S1**

*List of the nearest neighbours interatomic distances around V and Nb metal species, according to their location in Wyckoff sites.*

|        |       |
|--------|-------|
| V2-O1  | 1.590 |
| -O1    | 1.590 |
| -O16   | 1.818 |
| -O10   | 2.012 |
| -O10   | 2.012 |
| V1-O16 | 1.634 |
| -O2    | 1.986 |
| -O2    | 1.986 |

|         |       |
|---------|-------|
| -O17    | 2.112 |
| -O17    | 2.113 |
| Nb4-O3  | 1.793 |
| -O17    | 2.135 |
| -O8     | 2.152 |
| -O8     | 2.152 |
| Nb5-O17 | 1.869 |
| -O7     | 1.872 |
| -O11    | 2.001 |
| -O11    | 2.001 |
| Nb2-O4  | 1.820 |
| -O3     | 1.857 |
| -O14    | 2.030 |
| -O14    | 2.030 |
| -O6     | 2.163 |
| Nb3-O6  | 1.931 |
| -O12    | 1.985 |
| -O12    | 1.986 |
| -O1     | 2.065 |
| -O1     | 2.065 |
| Nb1-O15 | 1.996 |
| -O9     | 2.032 |
| -O9     | 2.032 |
| -O1     | 2.208 |
| -O5     | 2.230 |

|        |       |
|--------|-------|
| Nb6-O7 | 1.843 |
| -O7    | 1.843 |
| -O18   | 1.991 |
| -O18   | 1.991 |
| -O4    | 2.141 |
| -O4    | 2.141 |

## References:

- 1 J. Hidde, C. Gugushev and D. Klimm, *J. Cryst. Growth*, 2019, **509**, 60–65.
- 2 J. M. Amarilla, B. Casal and E. Ruiz-Hitzky, *J. Mater. Chem.*, 1996, **6**, 1005–1011.
- 3 D. R. G. Mitchell, *Microsc. Res. Tech.*, 2008, **71**, 588–593.
